# Supplementary material for: Expression of full-length Plasmodium falciparum P48/45 in P. berghei blood stages: A method to express and evaluate vaccine antigens
Source: PubMed Central journal article supplement — Mol Biochem Parasitol. Author manuscript; Available in PMC 2024 Apr 24. (PMC11040549; doi:10.1016/j.molbiopara.2018.07.009), 2018-07-24
Supplement: NIHMS1981775-supplement-Fig_S1.pdf [file NIHMS1981775-supplement-Fig_S1.pdf]

**A**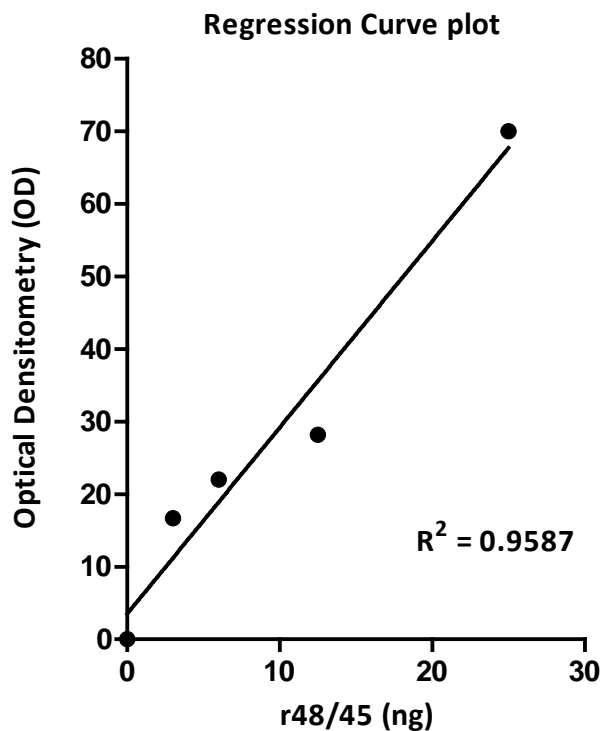**B**

| Sample                 | Total protein (ng) | OD     | OD (-*b/g) | **Pfs48/45 (ng) | % **Pfs48/45 |
|------------------------|--------------------|--------|------------|-----------------|--------------|
| <b>r48/45 (R0.10C)</b> | 50                 | 102.99 | 80.56      | n.a             | 35           |
|                        | 25                 | 92.45  | 70.02      | n.a             | 35           |
|                        | 12.5               | 50.63  | 28.20      | n.a             | 35           |
|                        | 6                  | 44.43  | 22.00      | n.a             | 35           |
|                        | 3                  | 39.12  | 16.68      | n.a             | 35           |
|                        | 0                  | 22.43  | 0          | n.a.            | n.a          |
| <b>Pf Gam</b>          | 500                | 48.87  | 26.44      | 3.12            | <b>0.62</b>  |
| <b>PbWT</b>            | 500                | 24.26  | 1.83       | n.a             | n.a          |
| <b>Pfs48/45@PbMSP1</b> | 500                | 35.08  | 12.65      | 1.25            | <b>0.25</b>  |
|                        | 250                | 28.09  | 5.65       | 0.29            | <b>0.12</b>  |
| <b>*Background</b>     | 0                  | 22.43  | 0.00       | n.a             | n.a          |

**Figure S1. Quantification of Pfs48/45 protein in Pfs48/45@PbMSP1 schizont lysate by Western blot analyses as shown in Figure 2A.**

Densitometry and regression curve analysis was performed on signals after probing Pfs48/45@PbMSP1 schizont lysate (500 ng) and a dilution series (50, 25, 12.5, 6 and 3 ng) of recombinant Pfs48/45 fusion protein (r48/45; R0.10C) with antibody 45.1.

A. Regression analysis based on the dilution series of recombinant Pfs48/45 fusion (R0.10C).

B. Optical densitometry (OD) values of signals before and after \*background (b/g) subtraction and the calculated protein content and the percentage of Pfs48/45 protein of the total amount of protein in the *P. falciparum* gametocyte (Pf Gam), *P. berghei* WT schizont (PbWT) and Pfs48/45@PbMSP1 schizont lysates. \*\* To calculate the amount and percentage of Pfs48/45 in the protein samples we adjusted for the proportion of Pfs48/45 (approximately 35%) in the recombinant protein R0.10C (a GLURP::Pfs48/45 fusion protein).
